# Supplementary material for: The oncogenic transcription factor FUS-CHOP can undergo nuclear liquid–liquid phase separation
Source: Oxford University Press journal article supplement (doi:10.1242/jcs.258578), 2021-08-06
Supplement: jcs258578supp.pdf [file jcs258578supp.pdf]

### FUS-CHOP Fusions

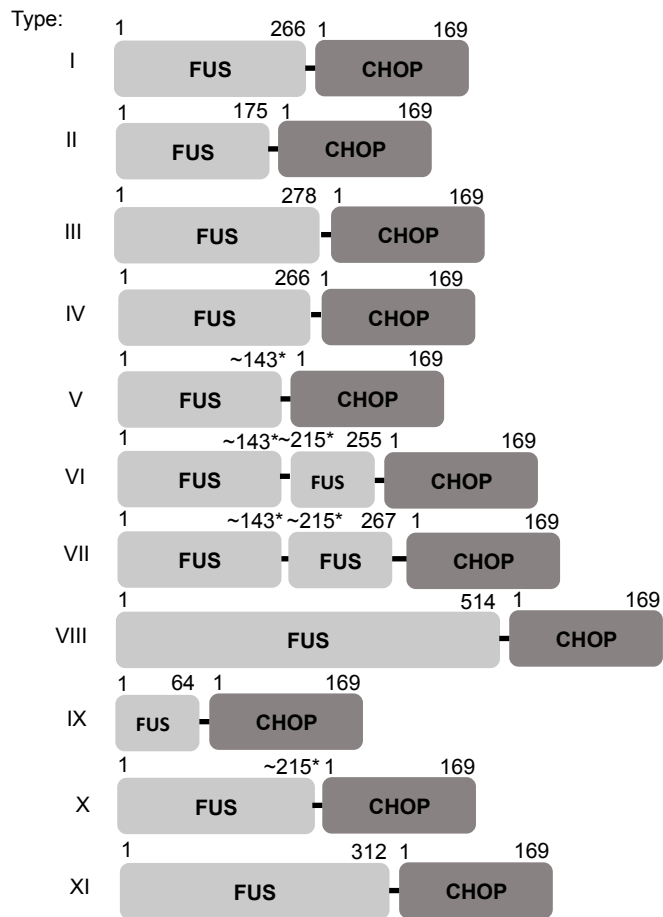

**Fig. S1.** Schematic of the 11 different types of FUS-CHOP fusions.

\*Approximations based on reporting of FUS exon fusions/truncations but not precise codon sites.

**FUS-CHOP-GFP Type I**

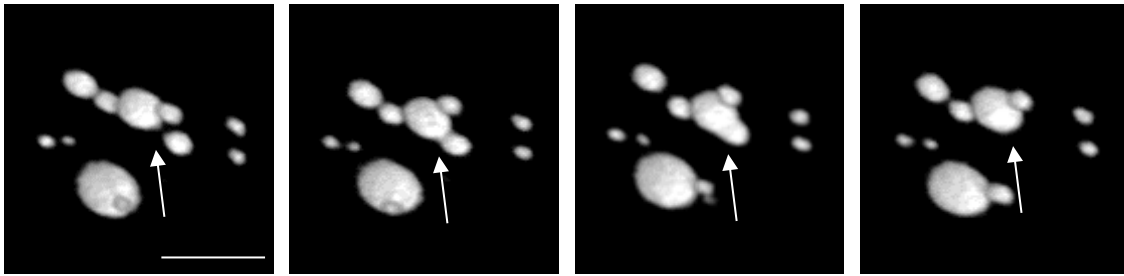

**FUS-CHOP-GFP Type II**

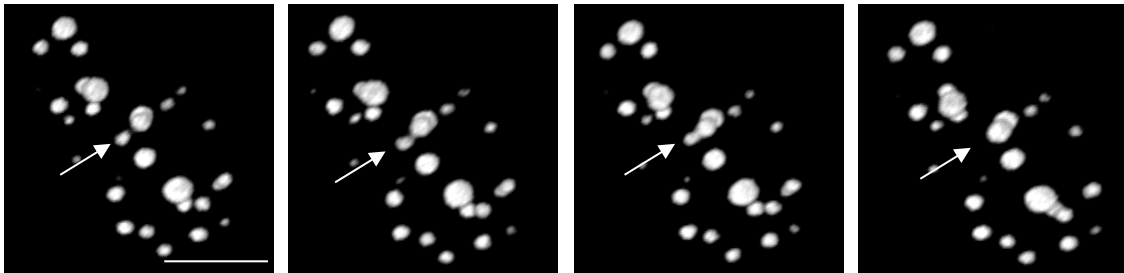

**Fig. S2.** Still frames from time course movies imaged by confocal microscopy of FUS-CHOP-eGFP type I and type II puncta fusing upon touching.

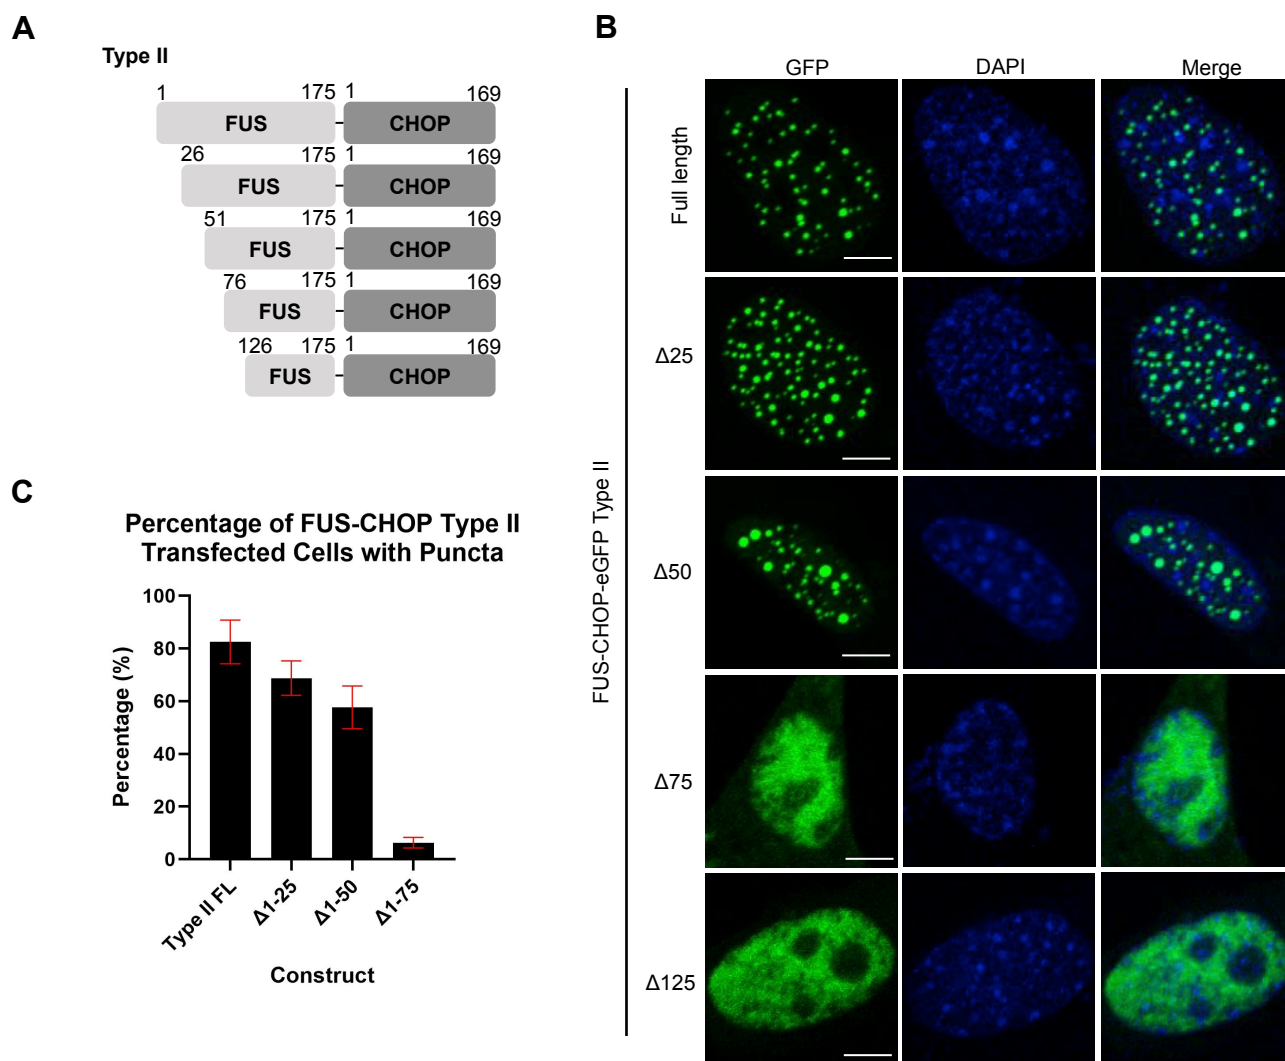

**Fig. S3.** A–Schematic of truncations made to FUS-CHOP-eGFP type II. B–Full-length or truncated FUS-CHOP-eGFP type II ectopically expressed in NIH 3T3 cells and imaged by confocal microscopy. Scale bar represents 5  $\mu$ m. Representative data from three experimental replicates. C– Quantification of the percentage of transfected cells with nuclear puncta. Error bars represent the mean with 95% c.i. of measurements from three experimental replicates.

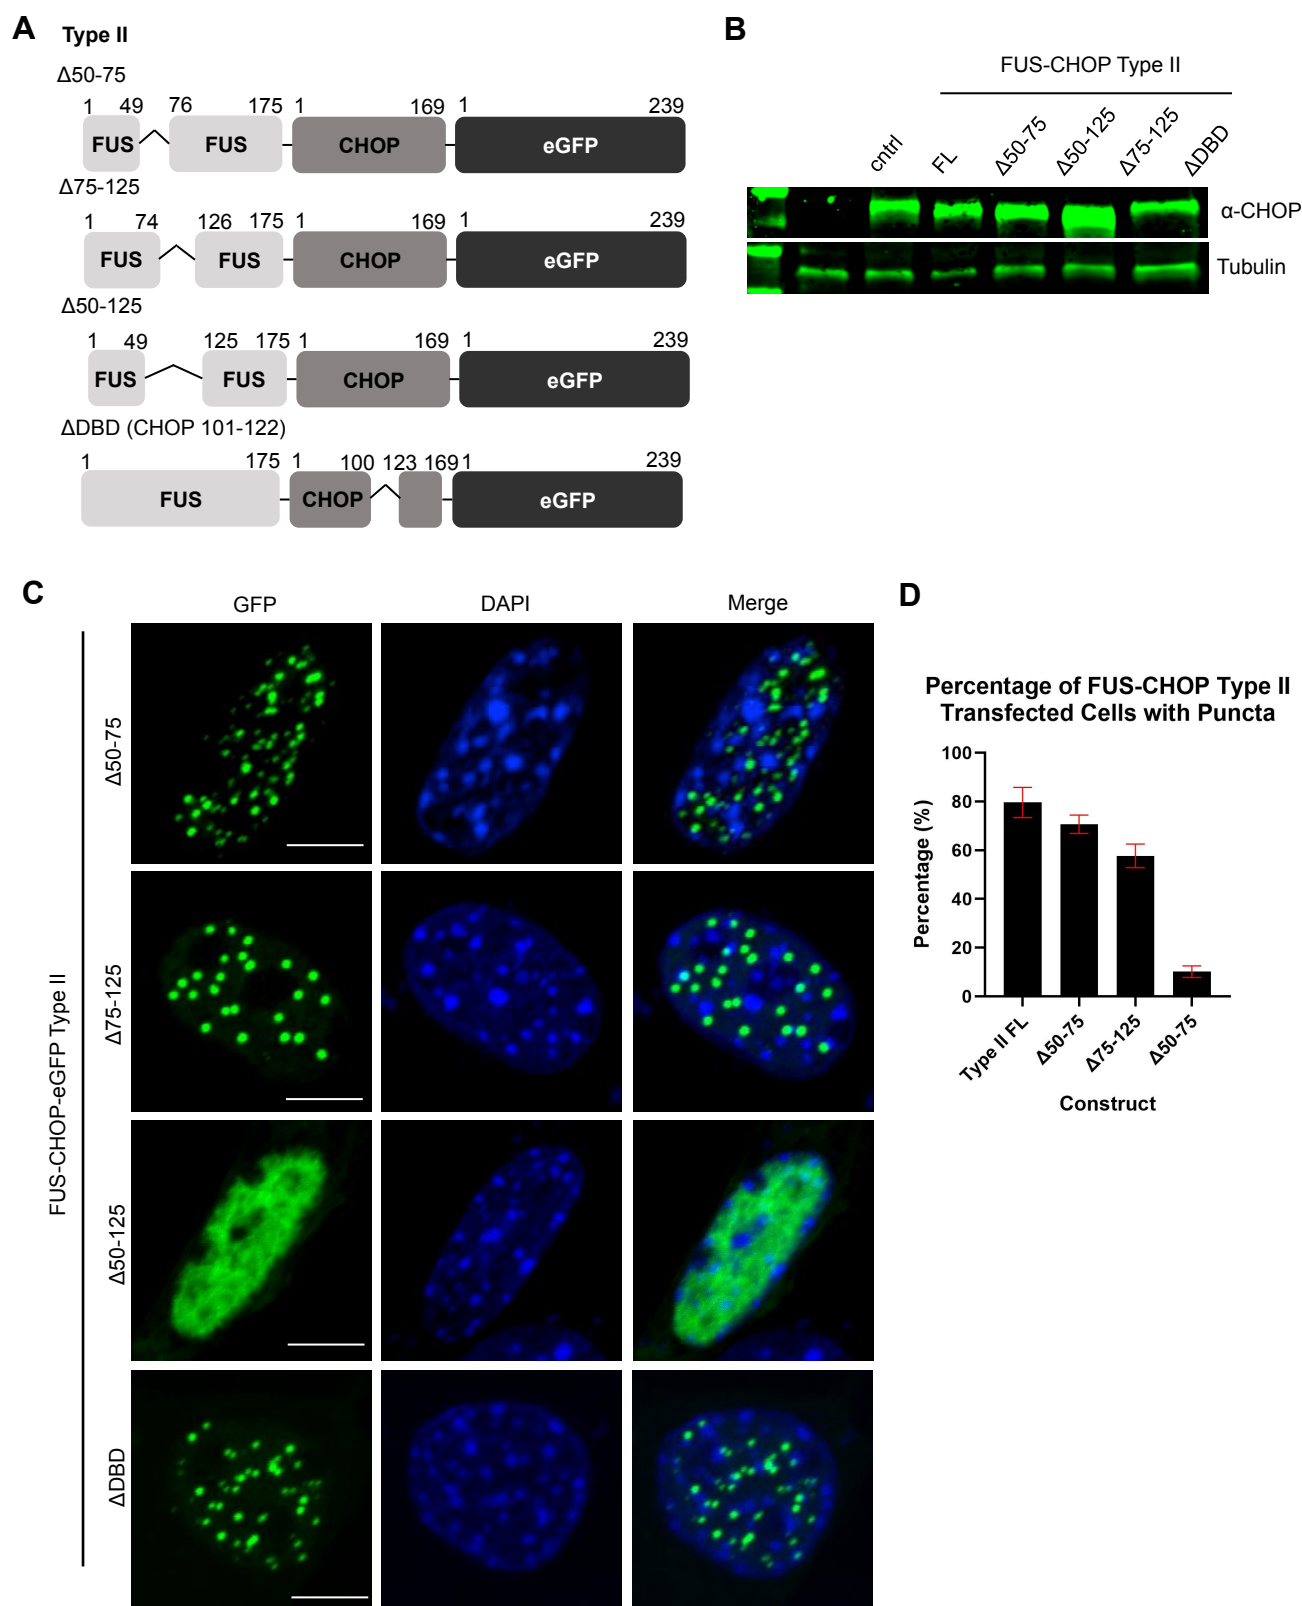

**Fig. S4.** A—Schematic of FUS-CHOP-eGFP type II internal truncations. B—NIH 3T3 cells transfected with full-length (FL) or truncated ( $\Delta$  50-75,  $\Delta$ 75-125,  $\Delta$ 50-125, or  $\Delta$ DBD) FUS-CHOP-eGFP type II. Cell lysates were analyzed by Western Blot and probed with anti-CHOP and anti-tubulin antibodies. C— Confocal images of internally truncated FUS-CHOP-eGFP nuclear puncta type I or type II. Scale bar represents 5  $\mu$ m. D— Percentage of transfected cells with nuclear puncta were quantified for each FUSCHOP-eGFP construct. Error bars represent the mean with 95% c.i. of measurements from three experimental replicates.

**Table S1.** Table denoting the number of tyrosine motifs removed in the FUS prion-like domain portion of FUS-CHOP truncations and internal deletions.

| <b>Construct</b>         | <b># of FUS PrLD tyrosine motifs removed</b> |
|--------------------------|----------------------------------------------|
| FUS-CHOP $\Delta$ 25     | 3                                            |
| FUS-CHOP $\Delta$ 50     | 7                                            |
| FUS-CHOP $\Delta$ 75     | 11                                           |
| FUS-CHOP $\Delta$ 125    | 18                                           |
| FUS-CHOP $\Delta$ 50-75  | 5                                            |
| FUS-CHOP $\Delta$ 75-125 | 8                                            |
| FUS-CHOP $\Delta$ 50-125 | 11                                           |

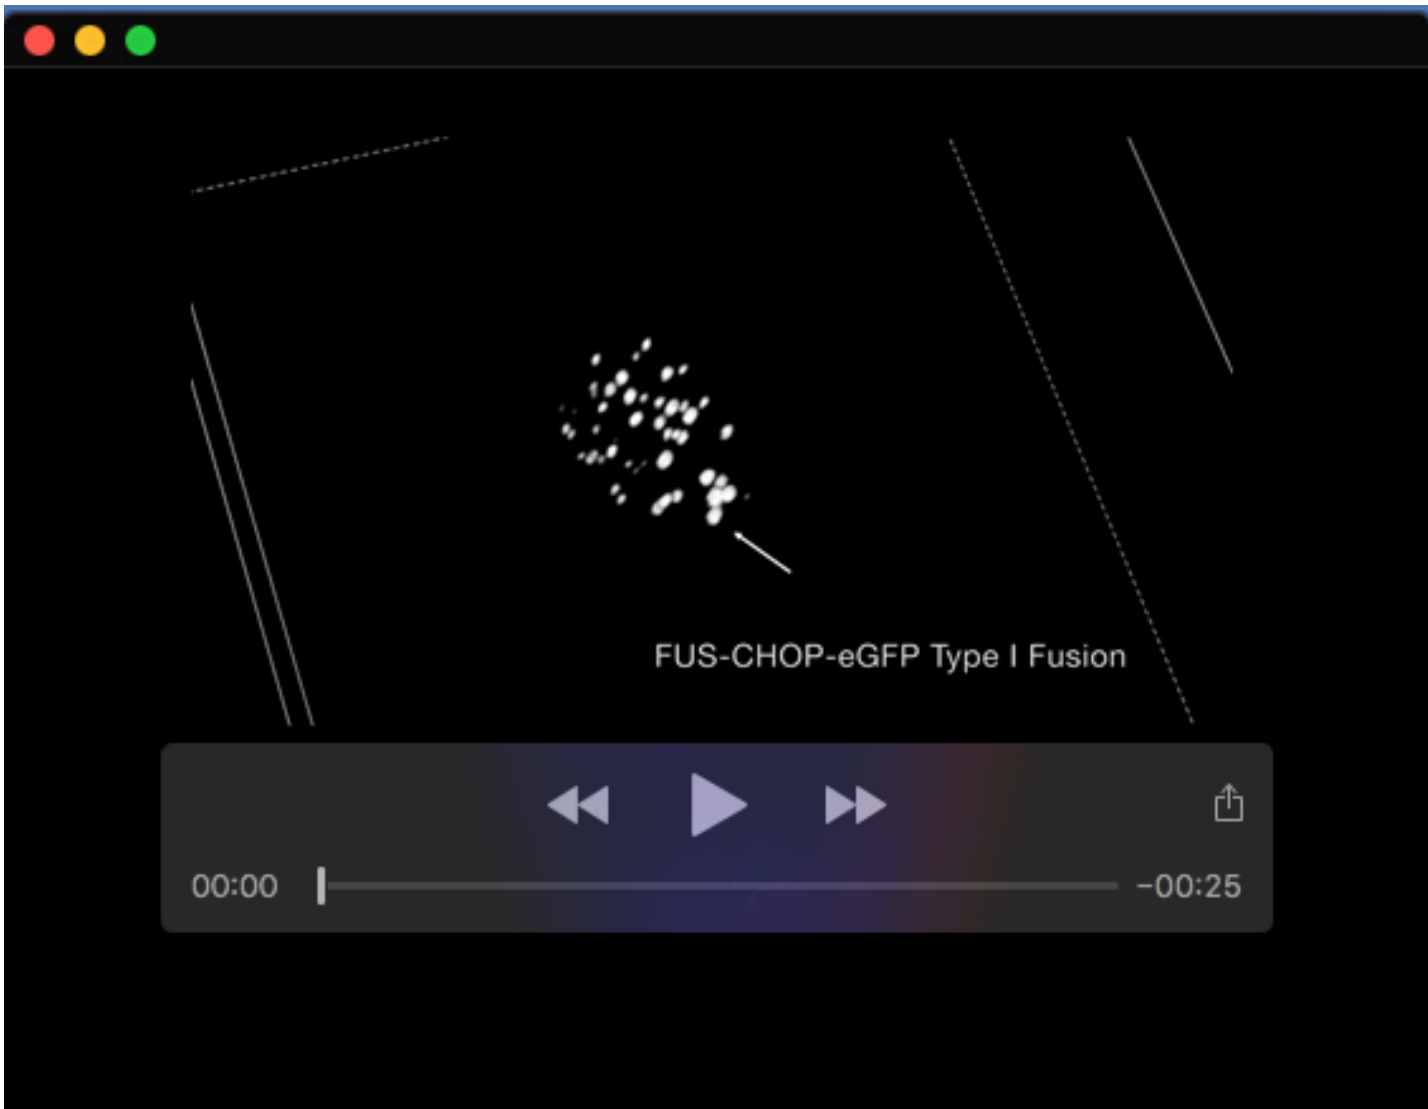

**Movie 1.** FUS-CHOP-eGFP puncta have liquid-like characteristics and undergo fusion in the nucleus.

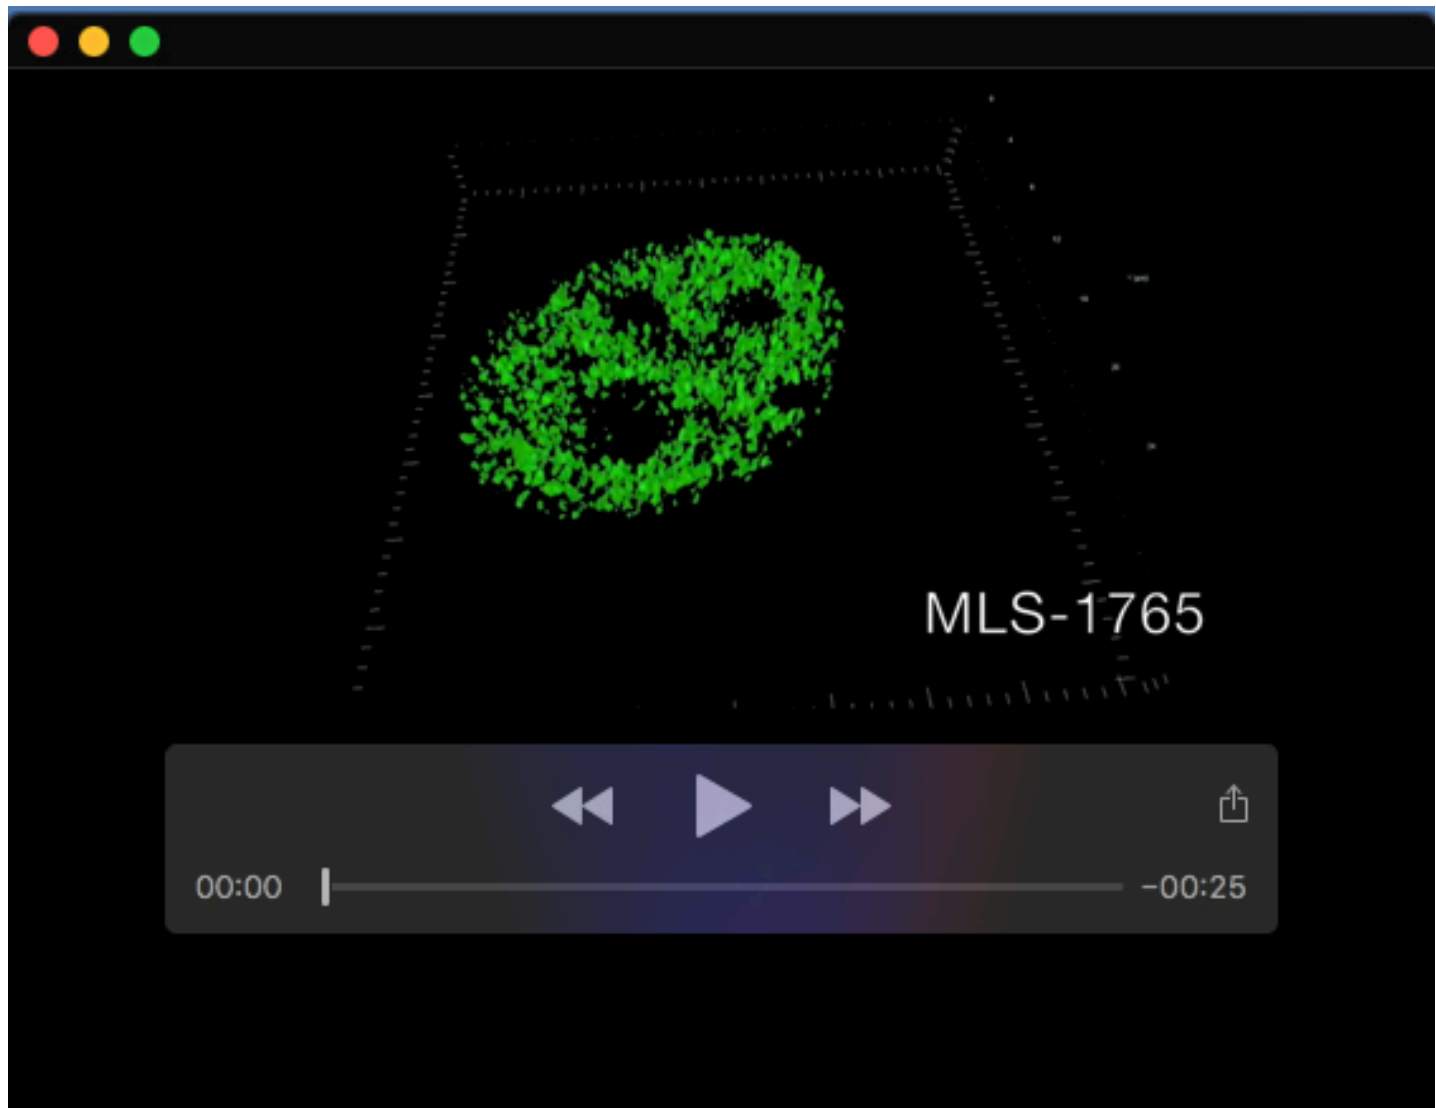

**Movie 2.** FUS-CHOP is localized to small nuclear puncta in Myxoid Liposarcoma cell lines.
